# Supplementary material
Source: Springer Nature journal article supplement (https://www.springermedizin.de/resource/supplementary/12943_2014_1376_MOESM6_ESM.pdf/9552842)

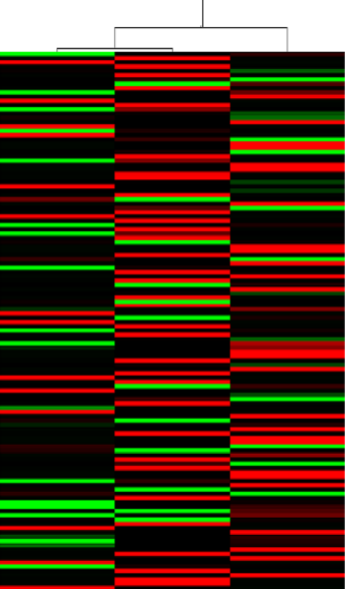

**126 genes with  
≥2 fold change**

Color range

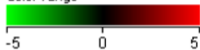

**EPC**

**EPC\_  
acLDL**

**EPC\_  
Late**

Supplement: MOESM6 [file 9552842]
